# Supplementary material for: Xue-Fu-Zhu-Yu capsule in the treatment of qi stagnation and blood stasis syndrome: a study protocol for a randomised controlled pilot and feasibility trial
Source: Springer Nature journal article supplement (doi:10.1186/s13063-018-2908-9), 2018-09-21

Figure S1 Study flow chart

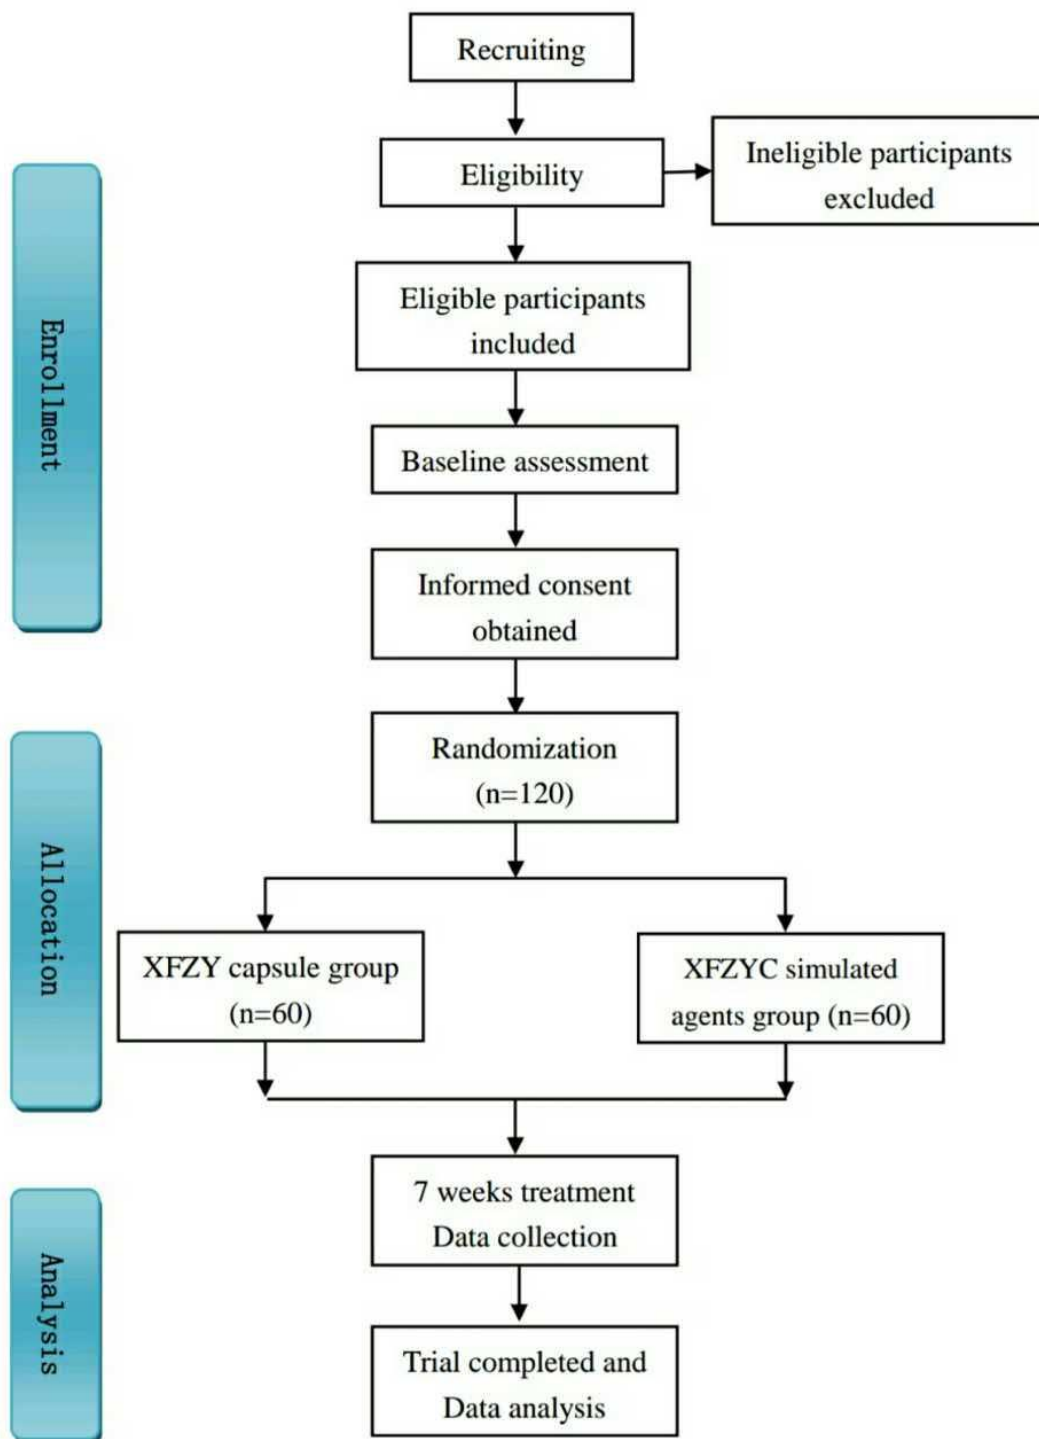

Supplement: MOESM2 [file 16143532]
