# Supplementary material for: Xue-Fu-Zhu-Yu capsule in the treatment of qi stagnation and blood stasis syndrome: a study protocol for a randomised controlled pilot and feasibility trial
Source: Springer Nature journal article supplement (doi:10.1186/s13063-018-2908-9), 2018-09-21
Supplement: MOESM3 [file 16143532]

**Table S1 TCM syndrome diagnostic scale of QS&BSS**

| Symptoms/signs                                                 | Score |    | Score |
|----------------------------------------------------------------|-------|----|-------|
|                                                                | Yes   | No |       |
| Pain                                                           | 9     | 0  |       |
| Irritability/depression                                        | 16    | 0  |       |
| Distending pain                                                | 2     | 0  |       |
| Scurry pain                                                    | 6     | 0  |       |
| Chest distress                                                 | 0.5   | 0  |       |
| Lumps in body                                                  | 7     | 0  |       |
| Petechia in the tongue                                         | 4     | 0  |       |
| Purplish tongue                                                | 1     | 0  |       |
| Unsmooth pulse                                                 | 4     | 0  |       |
| Deep pulse                                                     | 2     | 0  |       |
| <b>Total score</b>                                             |       |    |       |
| <b>if <math>\geq 20</math> points, diagnosed as QS&amp;BSS</b> |       |    |       |

Notes : pian include stomachache, abdominal pain, low back pain, dysmenorrhea, breast pain, limb pain, etc.

**Table S2 Chinese Medicine PRO Scale in Patients of Qi-stagnation and blood-stasis Syndrome**

---

**Instruction:**

In this questionnaire, you are going to answer 37 questions, which include physiology, psychology, independence and society four aspects. Please answer the question according to your specific situation for the last 2 weeks, and check in the  correspondently. This questionnaire applies five-points scoring method,

for example: Do you feel chest pain? None Occasionally Sometimes(Usually) Frequently Always

Thank you for your cooperation!

---

**I. Physiological domain**

1. Do you feel distending or stabbing pain on your body?

None Occasionally Sometimes(Usually) Frequently Always

2. Is that pain fixed?

None Occasionally Sometimes(Usually) Frequently Always

3. If you press on the painful area, will you feel aggravatingly painful?

None Occasionally Sometimes(Usually) Frequently Always

4. Is there any lump on your body?

None Occasionally Sometimes(Usually) Frequently Always

5. Are stringy veins easy to be notice?

None Occasionally Sometimes(Usually) Frequently Always

6. Have you ever notice the cyanotic lips?

None Occasionally Sometimes(Usually) Frequently Always

7. Is there any ecchymosis on the skin?

None Occasionally Sometimes(Usually) Frequently Always

8. Have you ever feel abdominal distension in the last 2 weeks?

None Occasionally Sometimes(Usually) Frequently Always

9. Have you ever feel short of breath in the last 2 weeks?

None Occasionally Sometimes(Usually) Frequently Always

10. Have you ever notice any abnormal complexion changes?

None Occasionally Sometimes(Usually) Frequently Always

11. Do you have dysmenorrhea? (only for women)

None Occasionally Sometimes(Usually) Frequently Always

12. Do you have a irregular menstruation? (only for women)

None Occasionally Sometimes(Usually) Frequently Always

13. Do you have any blood loss experience?

None Occasionally Sometimes(Usually) Frequently Always

---

---

14. Do you eat less than normal?

None Occasionally Sometimes(Usually) Frequently Always

15. Have you ever feel belch or hiccough?

None Occasionally Sometimes(Usually) Frequently Always

16. Do you feel dizziness?

None Occasionally Sometimes(Usually) Frequently Always

17. Have you ever notice any dry, rough and lusterless with red speckles and purple macules on your skin?

None Occasionally Sometimes(Usually) Frequently Always

18. Have you ever feel dry in the mouth but unwilling to drink?

None Occasionally Sometimes(Usually) Frequently Always

19. Do you feel eyes dull?

None Occasionally Sometimes(Usually) Frequently Always

20. Do you feel uncomfortable on the hypochondrium?

None Occasionally Sometimes(Usually) Frequently Always

21. Do you have any sensation of oppression on the chest?

None Occasionally Sometimes(Usually) Frequently Always

22. Do you have any bitter taste in the mouth?

None Occasionally Sometimes(Usually) Frequently Always

---

---

## II. Psychological domain

23. Do you have any irascibility rashness or impatience?

None Occasionally Sometimes(Usually) Frequently Always

24. Do you have any kind of depression?

None Occasionally Sometimes(Usually) Frequently Always

25. Do you usually sigh?

None Occasionally Sometimes(Usually) Frequently Always

26. Do you always regard life as an interesting journey?

None Occasionally Sometimes(Usually) Frequently Always

27. Are you confident to welcome your future life?

None Occasionally Sometimes(Usually) Frequently Always

28. Do you have faith in conquering diseases?

None Occasionally Sometimes(Usually) Frequently Always

29. Can you keep concentrating on a specific thing?

None Occasionally Sometimes(Usually) Frequently Always

30. Are you satisfied with your health condition?

None Occasionally Sometimes(Usually) Frequently Always

31. Will your diseases push you into spiritual pain?

None Occasionally Sometimes(Usually) Frequently Always

---

## III. Independence

32. Will the signs and symptoms affect your daily life or work?

None Occasionally Sometimes(Usually) Frequently Always

---

## IV. Social domain

33. Do you regard yourself as a burden on family members or friends?

None Occasionally Sometimes(Usually) Frequently Always

34. Does your disease affect on your family economic status?

None Occasionally Sometimes(Usually) Frequently Always

35. Do you feel satisfied with medical environment or traffic environment?

None Occasionally Sometimes(Usually) Frequently Always

36. Do you trust your doctor?

None Occasionally Sometimes(Usually) Frequently Always

37. Do you think the symptoms affect your social activity?

None Occasionally Sometimes(Usually) Frequently Always

---

Usage of the PRO scale: According to the scale framework, this scale can be scored in 4 domains. The options from "none" to "always" are given 1-5 points of the all above entries except 36th item. The options of 36th entry, from "none" to "always"

are given 5-1 points. Because the number of entries and the highest score in each domain are different, it's not conducive to compare the total score between domains. So, we use standard score (SS) to stand for the scores of each domain. The sum of the actual score (AS) of each entry divided by the total score of each entry in the domain, then multiplied by 100, is the SS of each domain.  $SS = (S_1+S_2+\dots+S_n) / (n*5)*100$ . E.g. in Physiological domain, the number of entry is 22, the AS are  $S_1+S_2+\dots+S_{22}$ , so the SS are  $(S_1+S_2+\dots+S_n) / (22*5)*100$ .

**Table S3 Single Symptom and Sign Scale of QS&BSS**

| <b>Symptom/sign</b>           | <b>No(0)</b> | <b>Mild(1)</b> | <b>Moderate(2)</b> | <b>Severe(3)</b> |
|-------------------------------|--------------|----------------|--------------------|------------------|
| <b>Pain</b>                   |              |                |                    |                  |
| <b>Headache</b>               |              |                |                    |                  |
| <b>Stomachache</b>            |              |                |                    |                  |
| <b>Abdominal pain</b>         |              |                |                    |                  |
| <b>Low back pain</b>          |              |                |                    |                  |
| <b>Joint pain</b>             |              |                |                    |                  |
| <b>Scurry pain</b>            |              |                |                    |                  |
| <b>Irritability</b>           |              |                |                    |                  |
| <b>Depression</b>             |              |                |                    |                  |
| <b>Sigh</b>                   |              |                |                    |                  |
| <b>Lumps in body</b>          |              |                |                    |                  |
| <b>Blood spot under the</b>   |              |                |                    |                  |
| <b>Cyanosis of skin</b>       |              |                |                    |                  |
| <b>Limitation of activity</b> |              |                |                    |                  |
| <b>Chest distress</b>         |              |                |                    |                  |
| <b>Flustered</b>              |              |                |                    |                  |
| <b>Rib-side distension</b>    |              |                |                    |                  |
| <b>Gastrectasia</b>           |              |                |                    |                  |
| <b>Abdominal distension</b>   |              |                |                    |                  |
| <b>Acid flux</b>              |              |                |                    |                  |
| <b>Anorexia</b>               |              |                |                    |                  |
| <b>Insomnia</b>               |              |                |                    |                  |
| <b>Dizziness</b>              |              |                |                    |                  |
| <b>Weak</b>                   |              |                |                    |                  |
| <b>Fatigue</b>                |              |                |                    |                  |
| <b>Thirst</b>                 |              |                |                    |                  |
| <b>Numbness</b>               |              |                |                    |                  |
| <b>Cyanosis of nail</b>       |              |                |                    |                  |
| <b>Dim complexion</b>         |              |                |                    |                  |
| <b>Scaly dry skin</b>         |              |                |                    |                  |
| <b>Purple and dark lip</b>    |              |                |                    |                  |
| <b>Tongue and pulse</b>       | <b>No(0)</b> |                | <b>Yes(1)</b>      |                  |
| <b>Dark red tongue</b>        |              |                |                    |                  |
| <b>Purplish tongue</b>        |              |                |                    |                  |
| <b>Petechia in the tongue</b> |              |                |                    |                  |
| <b>Thin and whitish fur</b>   |              |                |                    |                  |
| <b>Thin and yellowish fur</b> |              |                |                    |                  |
| <b>Umsmooth pulse</b>         |              |                |                    |                  |
| <b>String like pulse</b>      |              |                |                    |                  |
| <b>Deep pulse</b>             |              |                |                    |                  |

**Table S4 Pain Scale of QS&BSS**

---

**Position of pain:**

---

**Visual Analogue Scale pain index:**                      score

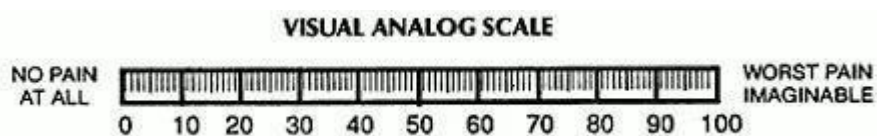

---

**Degree of pain**

- 0 score : None
- 2 score : Mild pain(doesn't affect work and life, VAS score 1-3)
- 4 score : Moderate pain(affects work and life partly, VAS score 4-6)
- 6 score : Severe pain(affects work and life, need rest, VAS score 7-10)

---

**Duration of pain**

- 0 score : None
- 2 score : Less than 1 hour / day
- 4 score : 1-2 hours / day
- 6 score : Over 2 hours / day

---

**Frequency of pain:**

1-7 score:      day/week

---

**Total scores of pain:**

---
